# Supplementary material for: Glucosylimidazolium Hydroxide: A Bench-Stable Carbohydrate Based Building Block
Source: MDPI journal article supplement (doi:10.3390/compounds1030014), 2021-12-07
Supplement: s1 [file s1]

Communication

# Glucosylimidazolium Hydroxide: A Bench-Stable Carbohydrate Based Building Block

Johannes Schnegas <sup>1</sup> and Stefan Jopp <sup>1,2,\*</sup>

<sup>1</sup> Institute of Chemistry, University of Rostock, Albert-Einstein-Str. 3a, 18059 Rostock, Germany; johannes.schnegas@uni-rostock.de

<sup>2</sup> Department Life, Light & Matter, University of Rostock, Albert-Einstein-Str. 25, 18059 Rostock, Germany

\* Correspondence: stefan.jopp@uni-rostock.de

## NMR Spectra

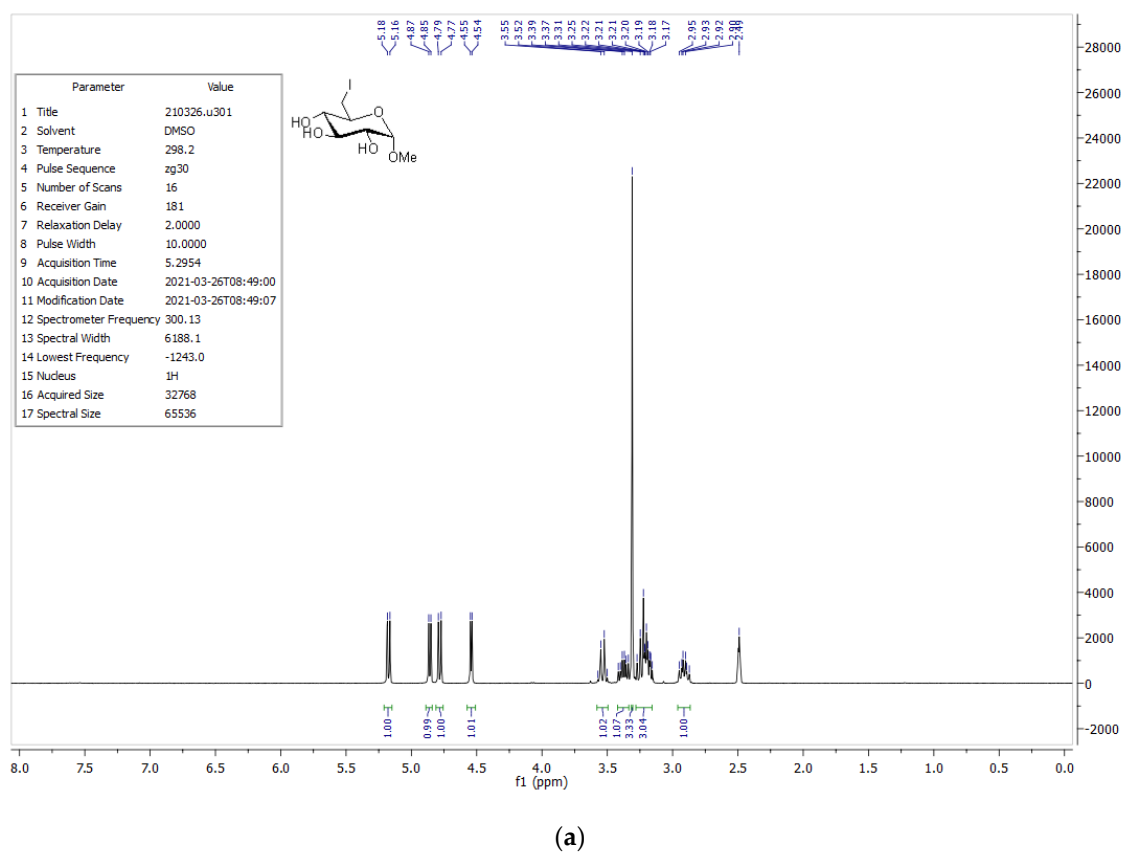

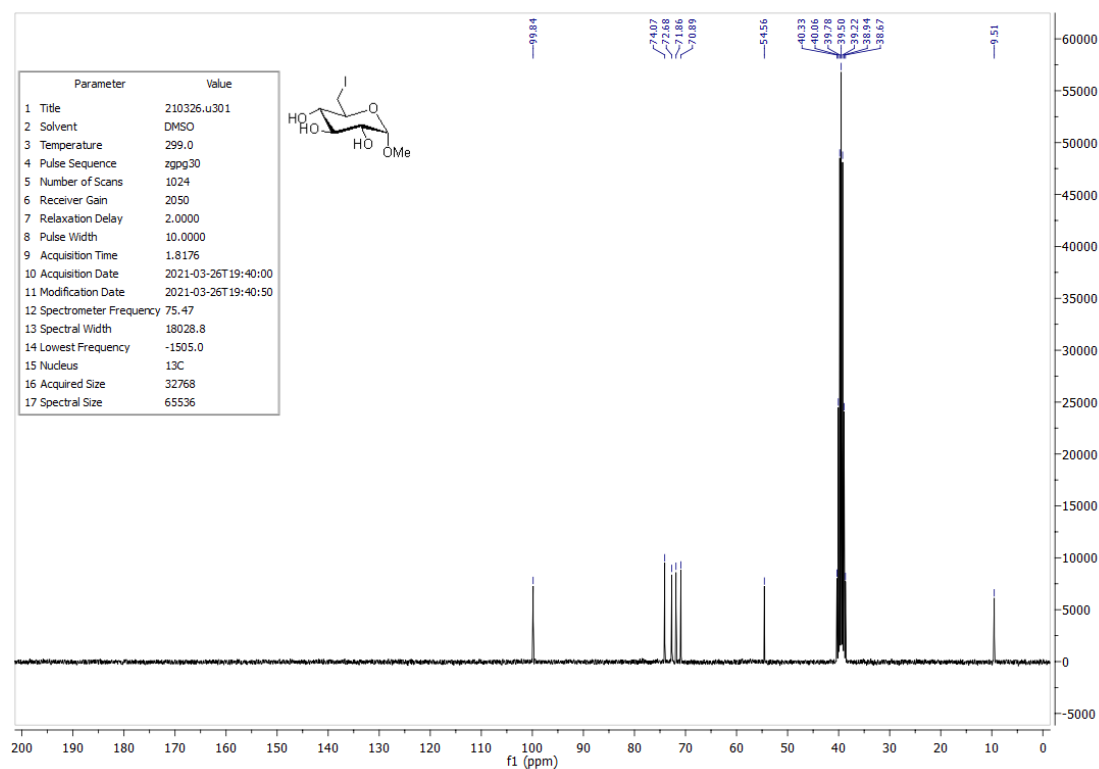

(b)

Figure S1. Methyl-6-iodo- $\alpha$ -D-glucopyranoside 2.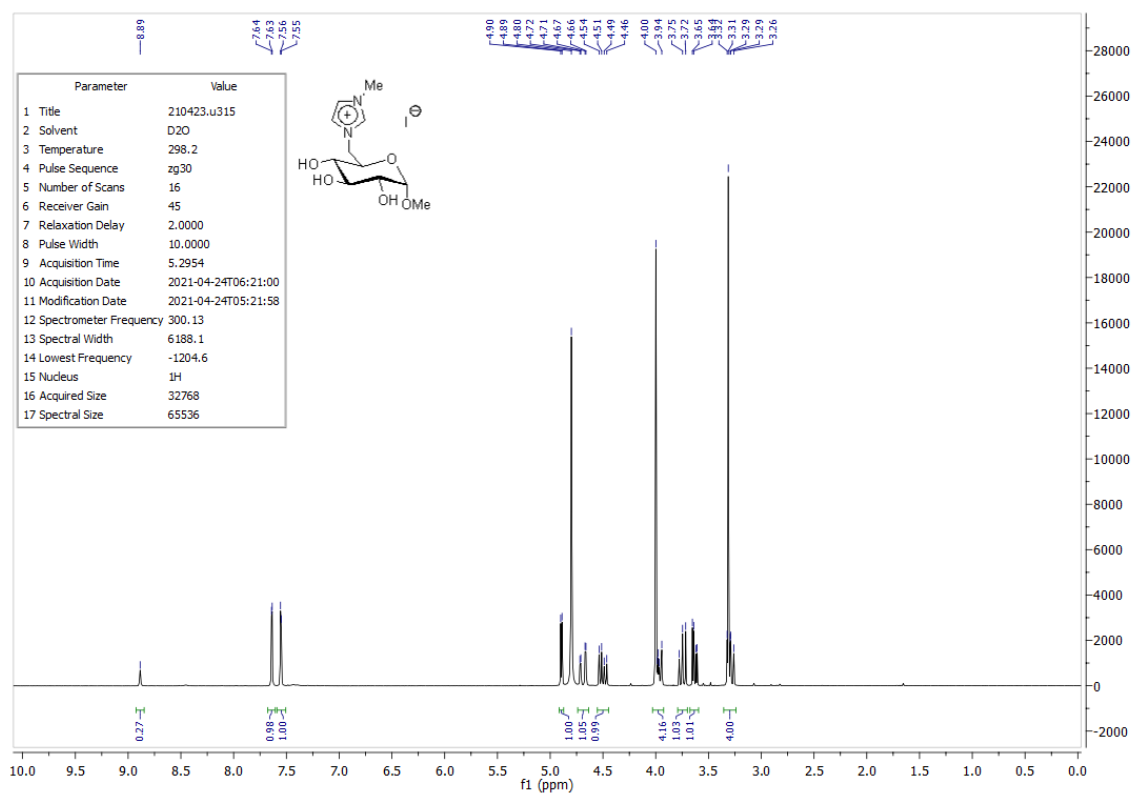

(a)

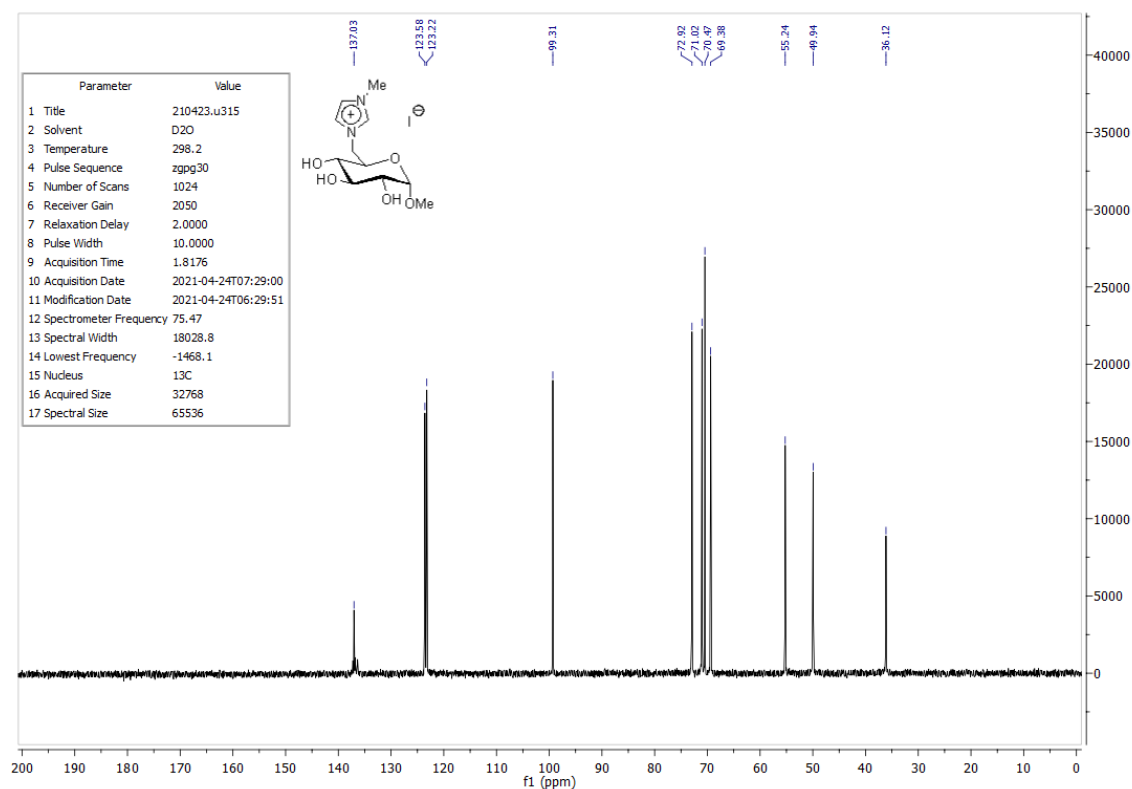

(b)

Figure S2. 1-(Methyl- $\alpha$ -D-glucopyranosid-6-yl)-3-methylimidazolium iodide 3.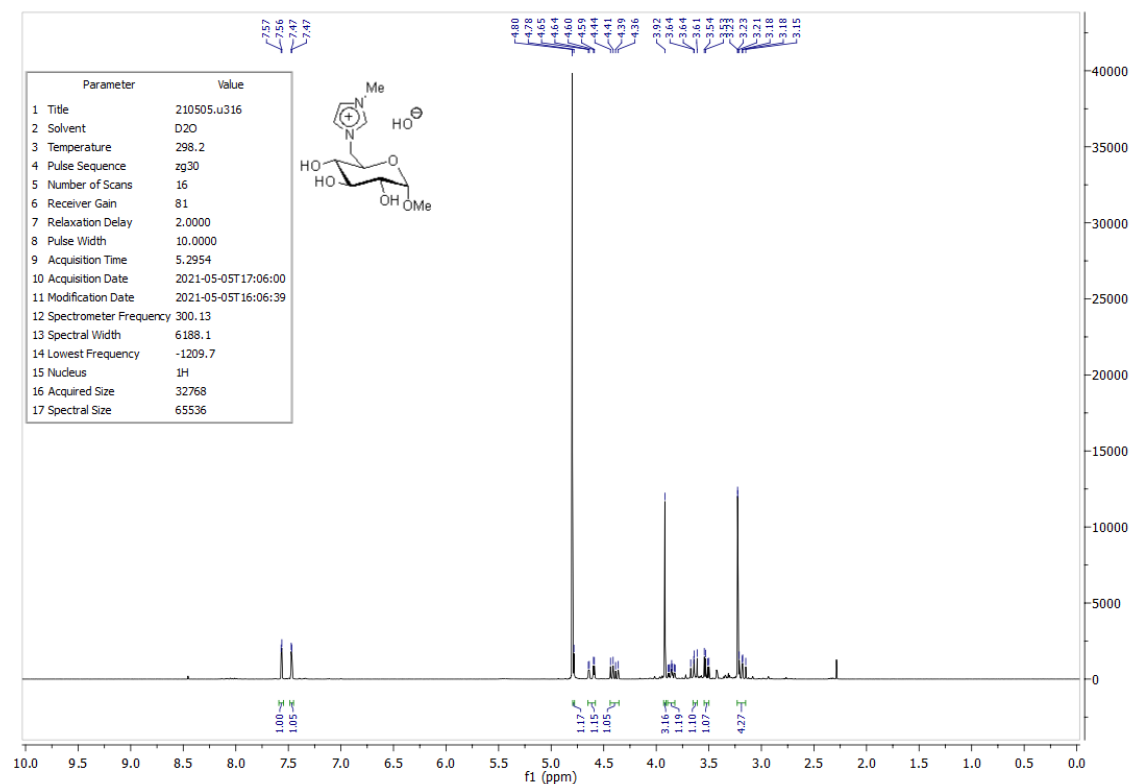

(a)

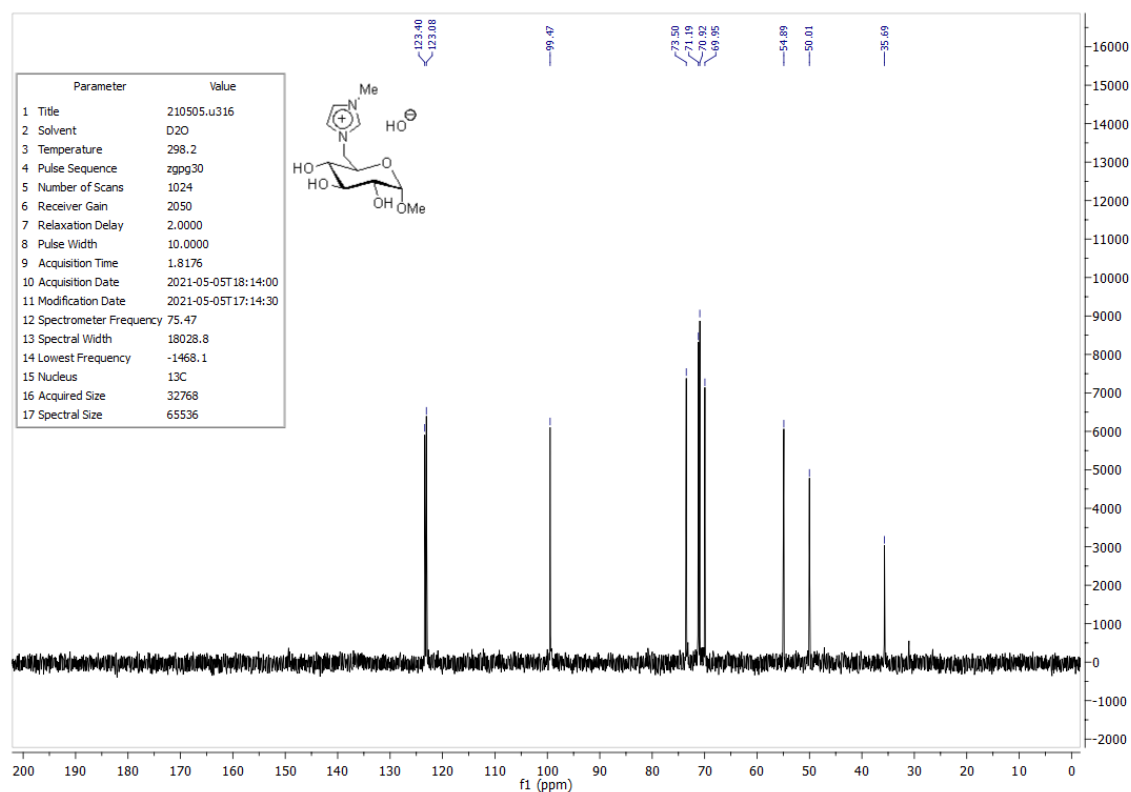

(b)

Figure S3. 1-(Methyl- $\alpha$ -D-glucopyranosid-6-yl)-3-methylimidazolium hydroxide 4.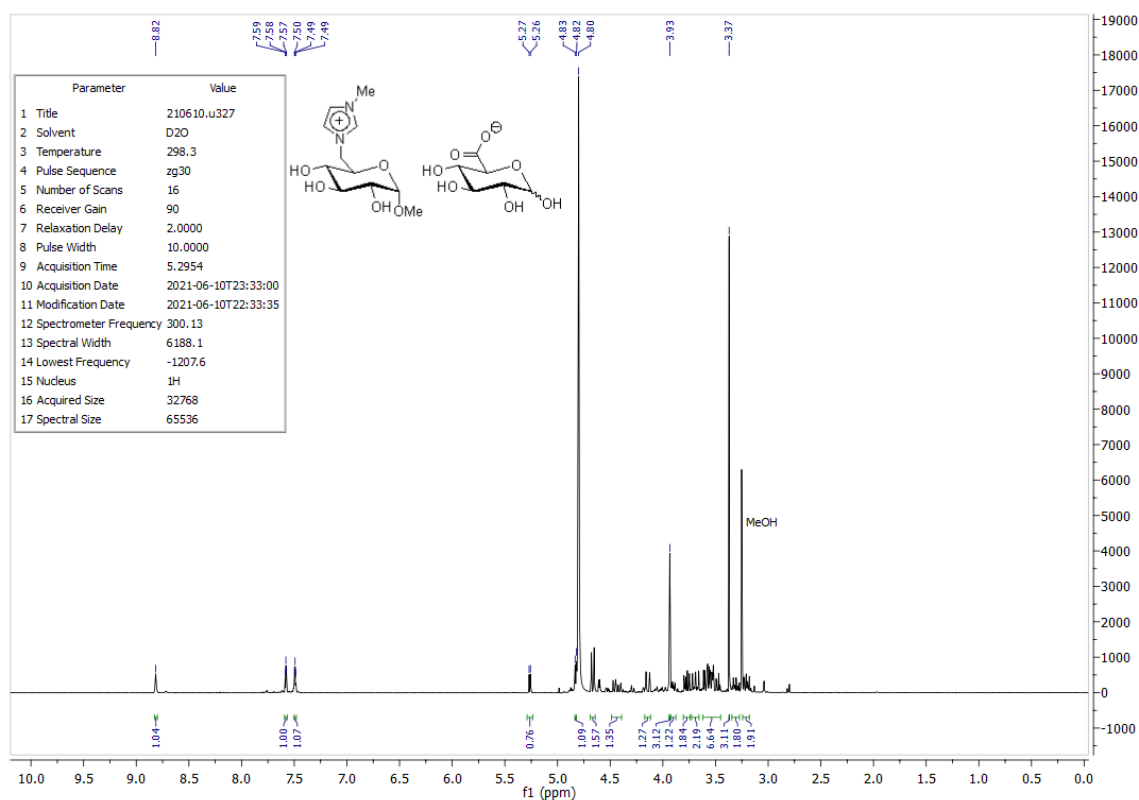

(a)

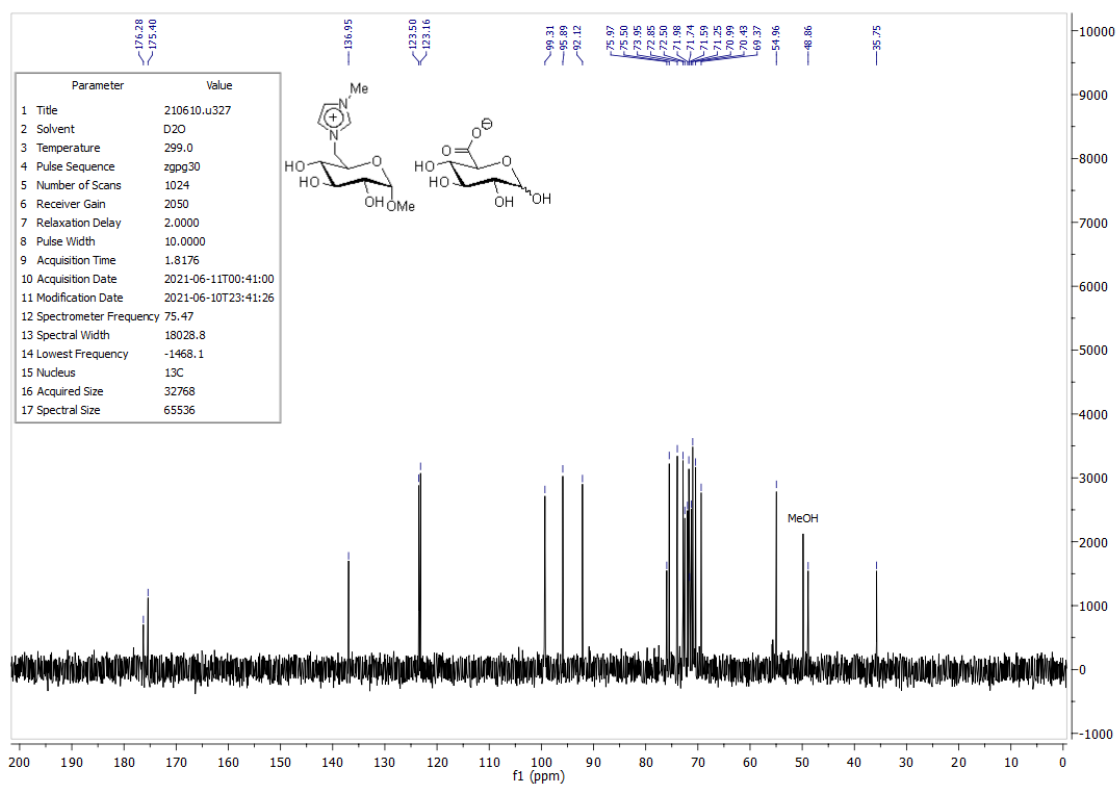

(b)

Figure S4. 1-(Methyl- $\alpha$ -D-glucopyranosid-6-yl)-3-methylimidazolium glucuronate **6a**.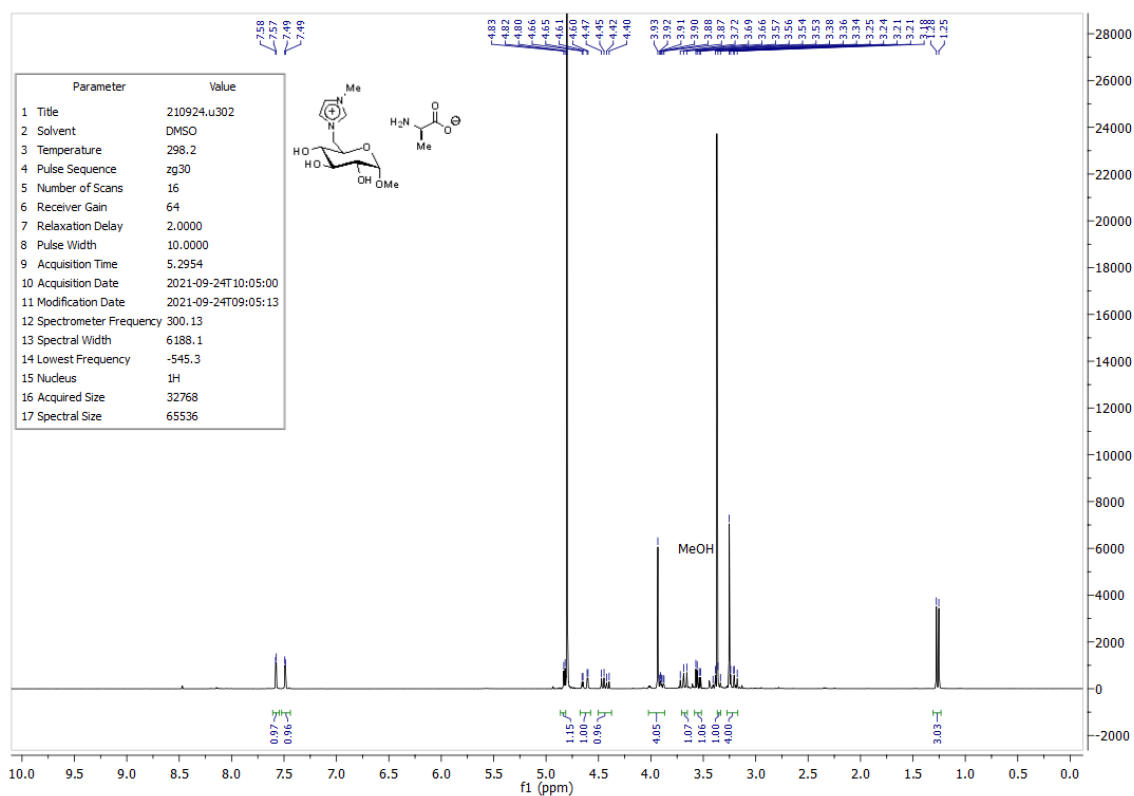

(a)

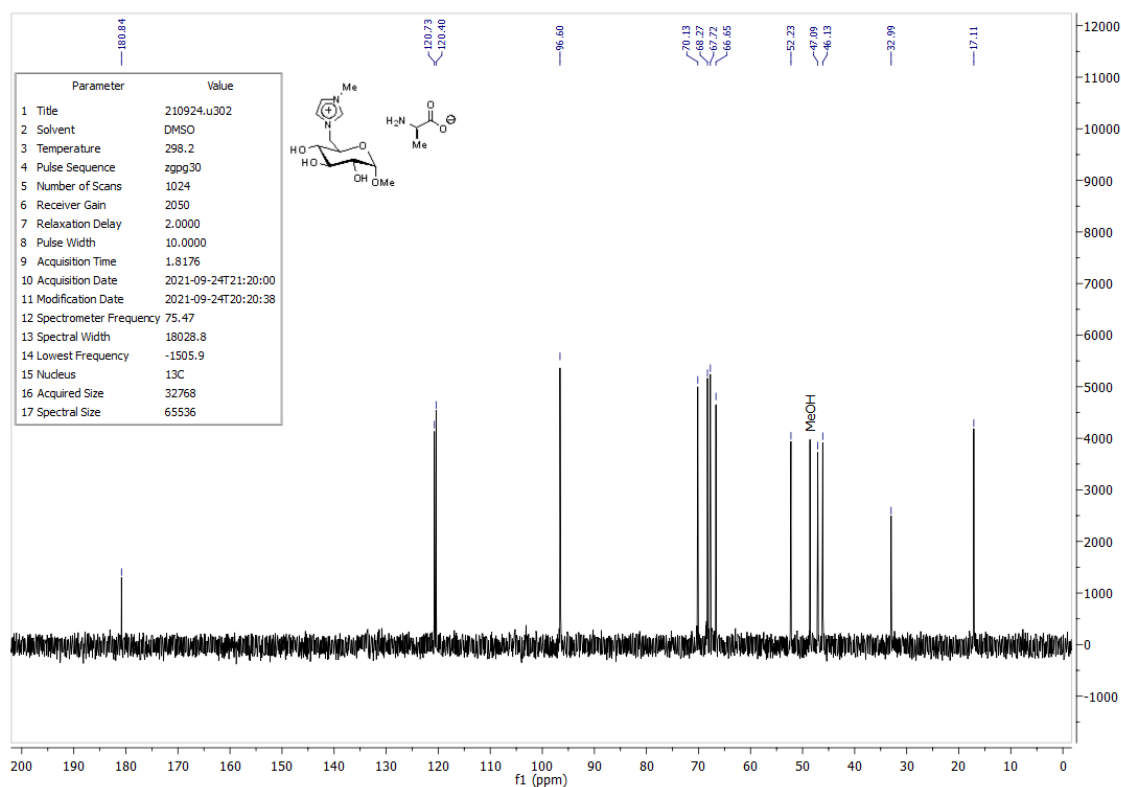

(b)

Figure S5. 1-(Methyl- $\alpha$ -D-glucopyranosid-6-yl)-3-methylimidazolium alaninate **6b**.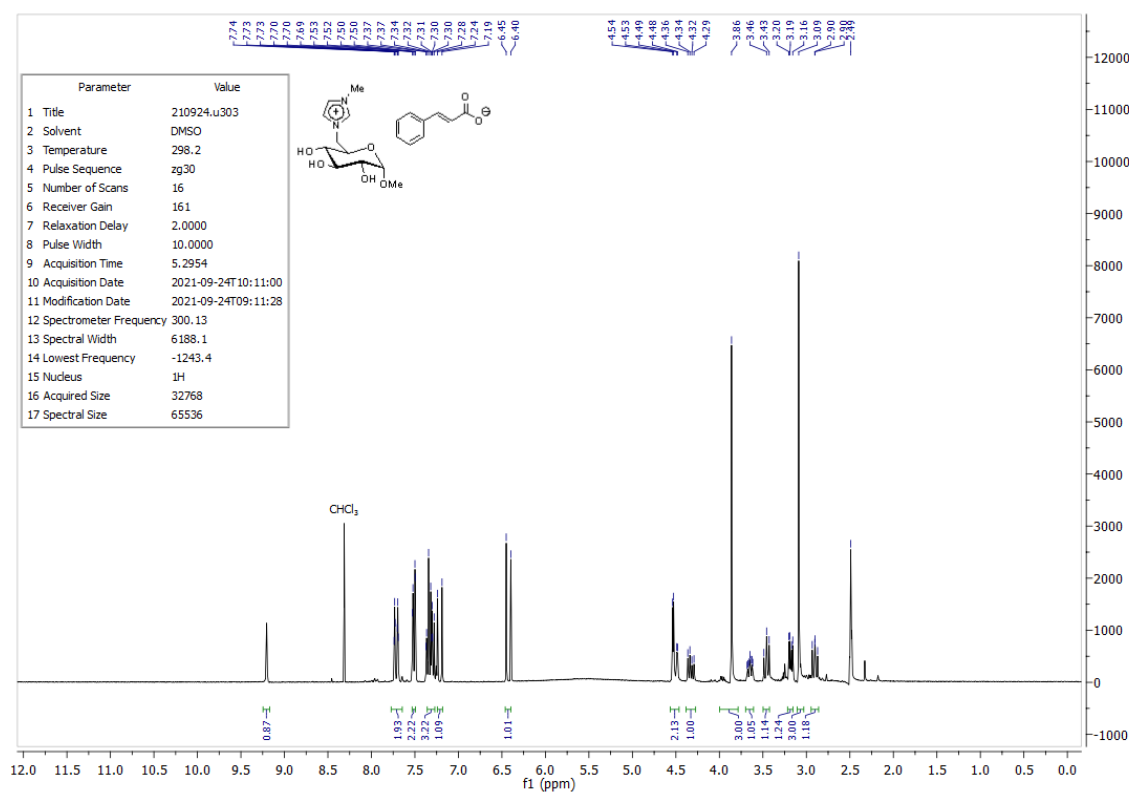

(a)

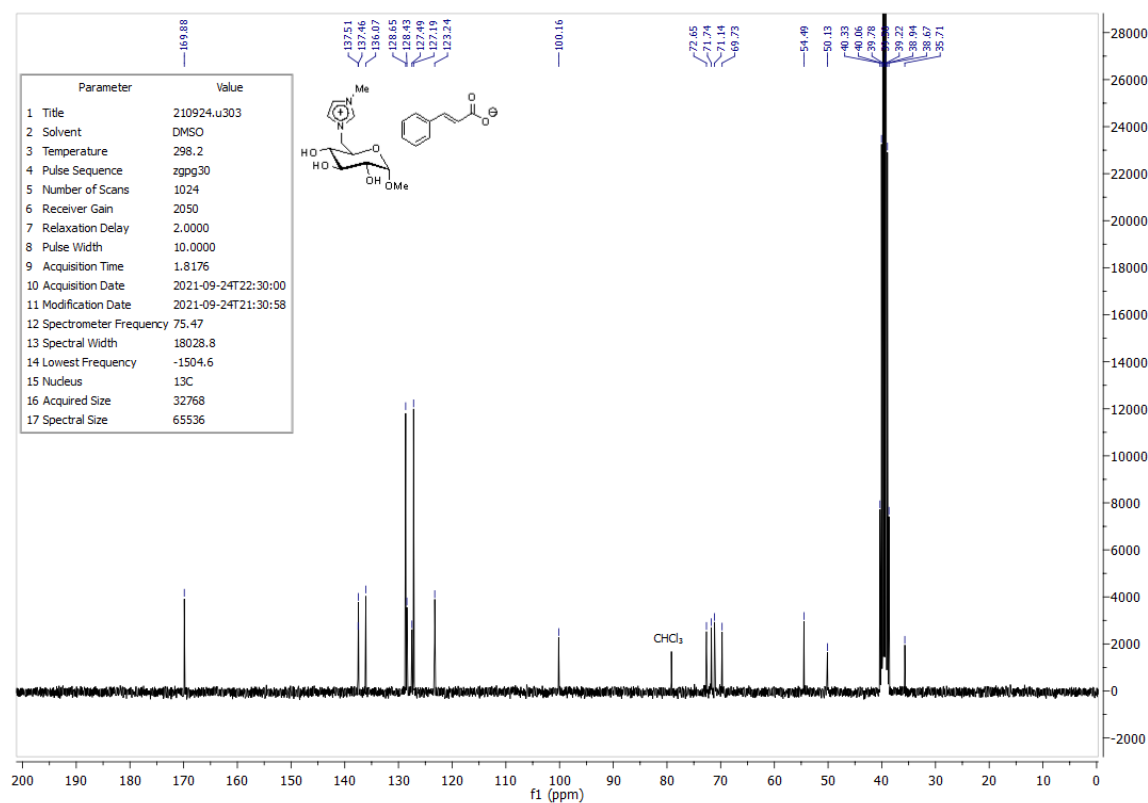

(b)

Figure S6. 1-(Methyl-α-D-glucopyranosid-6-yl)-3-methylimidazolium trans-cinnamate **6c**.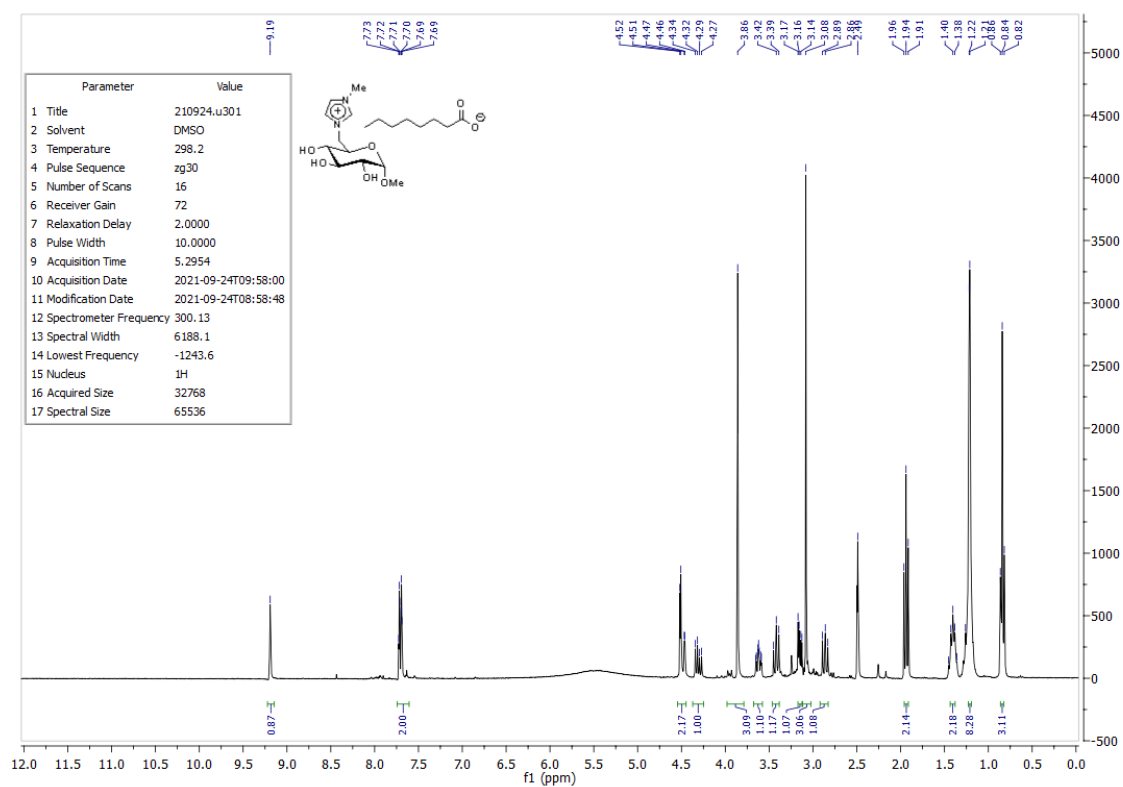

(a)

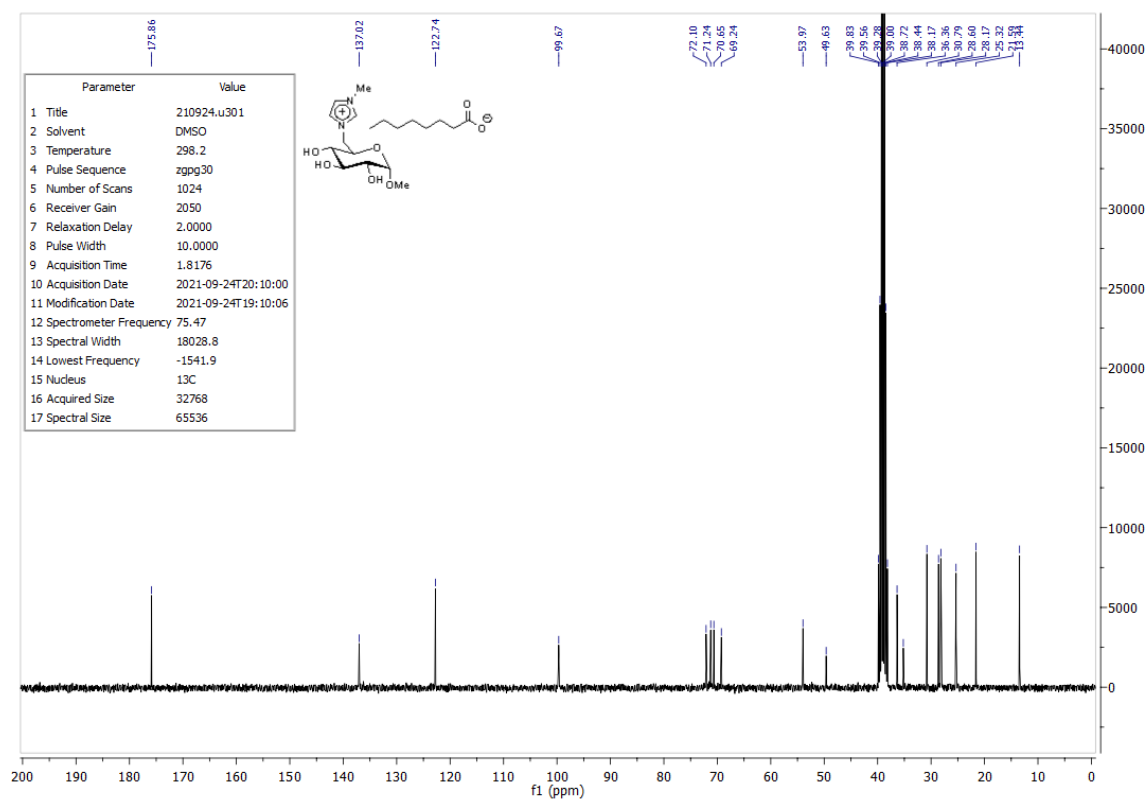

(b)

**Figure S7.** 1-(Methyl- $\alpha$ -D-glucopyranosid-6-yl)-3-methylimidazolium caprylate **6d**.
